# Supplementary material for: Increased frequencies of circulating CXCL10-, CXCL8- and CCL4-producing monocytes and Siglec-3-expressing myeloid dendritic cells in systemic sclerosis patients
Source: Springer Nature journal article supplement (doi:10.1007/s00011-017-1106-7), 2017-11-10

## **Inflammation Research**

### **Increased frequencies of circulating CXCL10-, CXCL8- and CCL4-producing monocytes and Siglec-3-expressing myeloid dendritic cells in Systemic Sclerosis patients.**

Tiago Carneiro<sup>1,2,3\*</sup>, Sara Horta<sup>1,4\*</sup>, Joel A.G. van Roon<sup>2,3</sup>, Mariana Santiago<sup>5</sup>, Maria J. Salvador<sup>5</sup>, Hélder Trindade<sup>1</sup>, Timothy R.D.J. Radstake<sup>2,3</sup>, José A.P. da Silva<sup>5,6</sup>, Artur Paiva<sup>1,7</sup>

#### **Affiliations:**

<sup>1</sup>Blood and Transplantation Center of Coimbra, Portuguese Institute of Blood and Transplantation, Coimbra, Portugal

<sup>2</sup>Department of Rheumatology & Clinical Immunology, University Medical Center Utrecht, the Netherlands.

<sup>3</sup>Laboratory of Translational Immunology, University Medical Center Utrecht, the Netherlands.

<sup>4</sup>Department of Chemistry, University of Aveiro, Aveiro, Portugal

<sup>5</sup>Department of Rheumatology, Coimbra University Hospital Center, Coimbra, Portugal,

<sup>6</sup>Faculty of Medicine, University of Coimbra, Coimbra, Portugal

<sup>7</sup>Flow Cytometry Unit, Clinical Pathology Service, Coimbra University Hospital Center, Coimbra, Portugal

\*T. Carneiro and S. Horta equally contributed to this work.

#### **Correspondent author:**

Artur Paiva, *PhD*

Unidade de Gestão Operacional de Citometria, Serviço de Patologia Clínica

Praceta Prof. Mota Pinto, Ed. S. Jerónimo, 3º piso, 30001-301 Coimbra, Portugal

Tel: (+351) 239400400

E-mail: artur.paiva@chuc.min-saude.pt

**Supplementary Fig. S1.** Representative flow cytometry dot plots illustrating the quantification (%) of classical and non-classical monocytes and myeloid dendritic cells (mDC) A) spontaneously producing CXCL10 and CCL4 as well as B) IL-6 and CXCL8 upon in vitro stimulation with LPS/IFN- $\gamma$ . One representative HC is depicted.

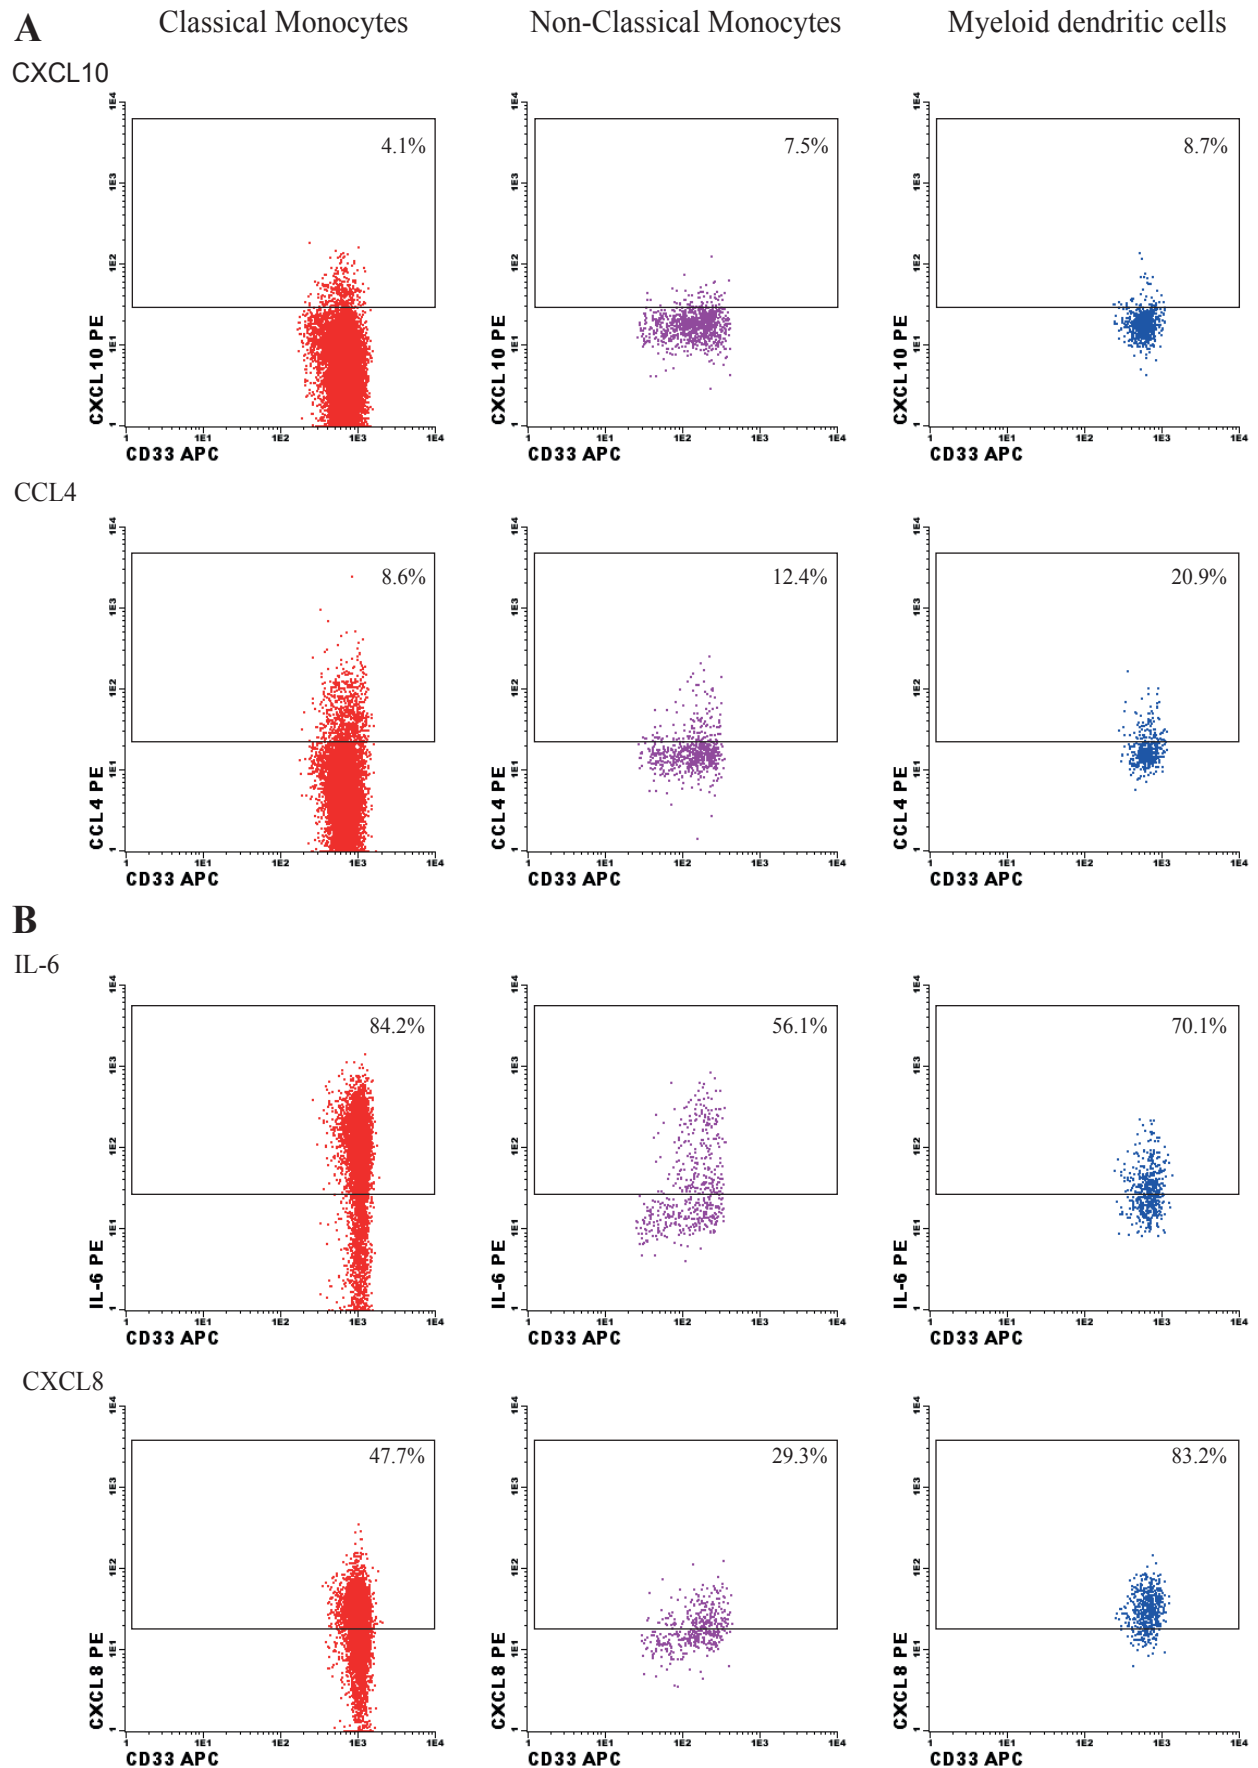

**Supplementary Fig. S2.** Quantification of classical, intermediate and non-classical monocytes subsets and myeloid dendritic cells (mDC) in SSc patients. A) Percentage within the CD45+ cells and B) absolute numbers indicated in number of cells *per*  $\mu\text{L}$ . Statistically significant differences were considered when \* $p < 0.05$  and \*\*\* $p < 0.01$  (Kruskal-Wallis followed by Mann-Whitney U test).

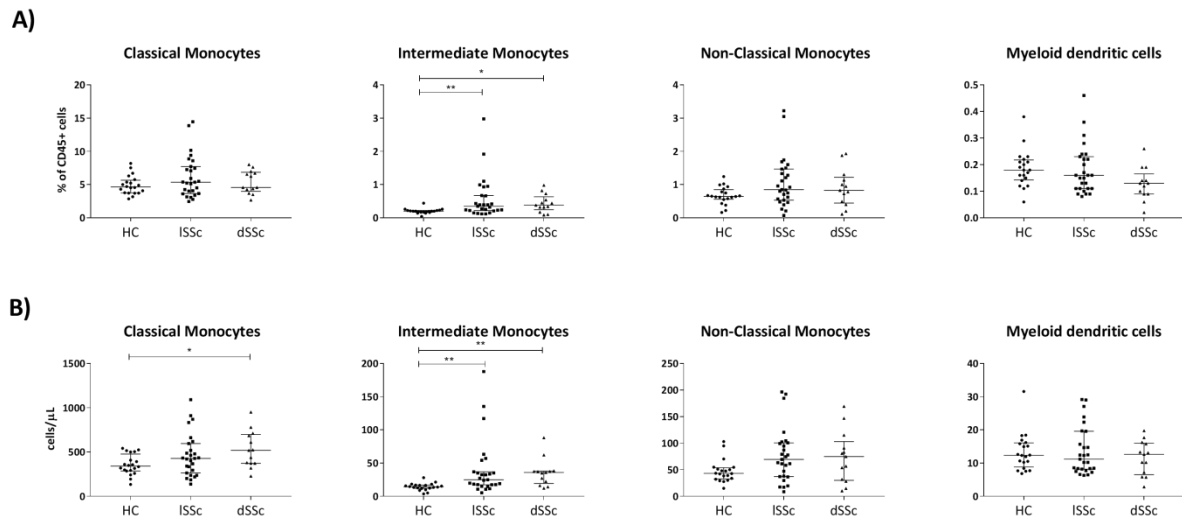

**Supplementary Fig. S3.** Frequency (%) of classical, non-classical monocytes and myeloid dendritic cells (mDCs) spontaneously producing CXCL10 and CCL4 cells and CXCL8 and IL-6 upon *in vitro* stimulation with LPS/IFN- $\gamma$ , clustering SSc patients according to high and low mRss (base on the average of the score: 12). Statistically significant differences were considered when \* $p < 0.05$  and \*\*\*  $p < 0.01$  (Kruskal-Wallis followed by Mann-Whitney U test).

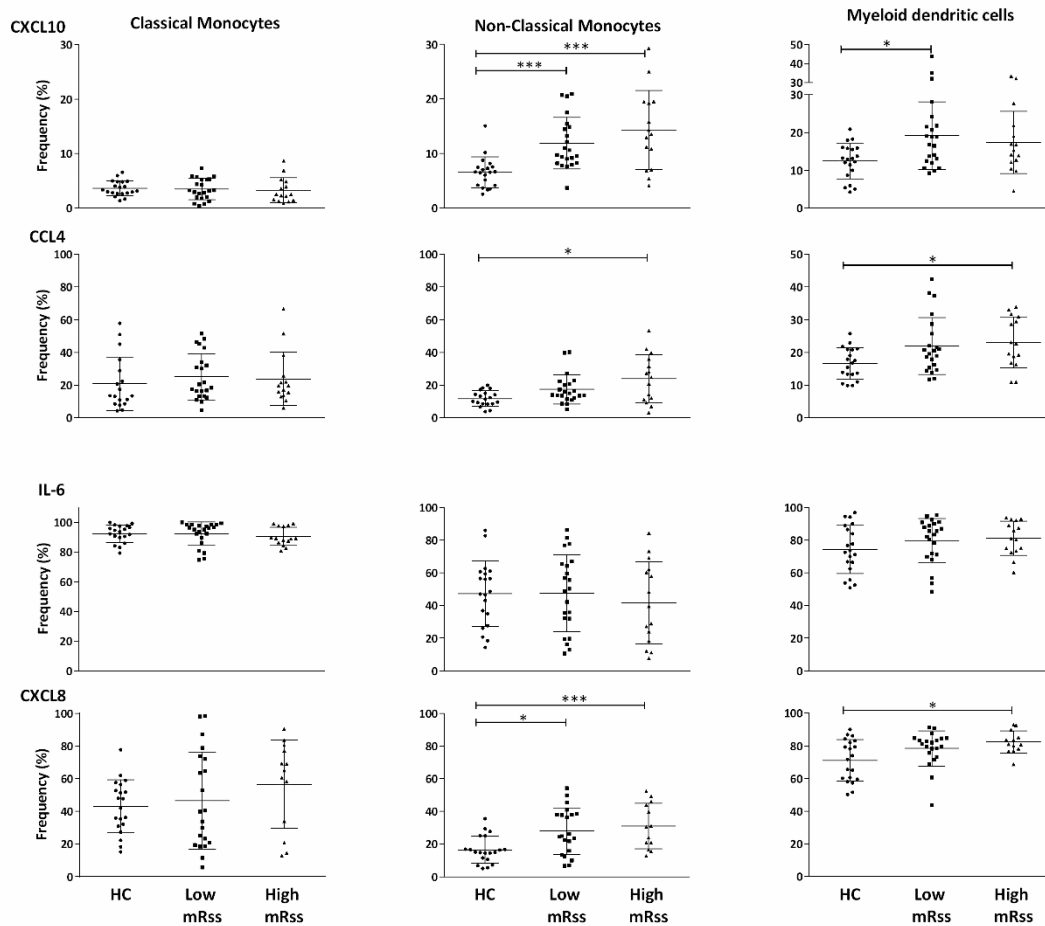

**Supplementary Fig. S4.** Frequency (%) of classical, non-classical monocytes and myeloid dendritic cells (mDCs) spontaneously producing CXCL10 and CCL4 cells and CXCL8 and IL-6 upon *in vitro* stimulation with LPS/IFN- $\gamma$ , according to the treatment with corticosteroids.

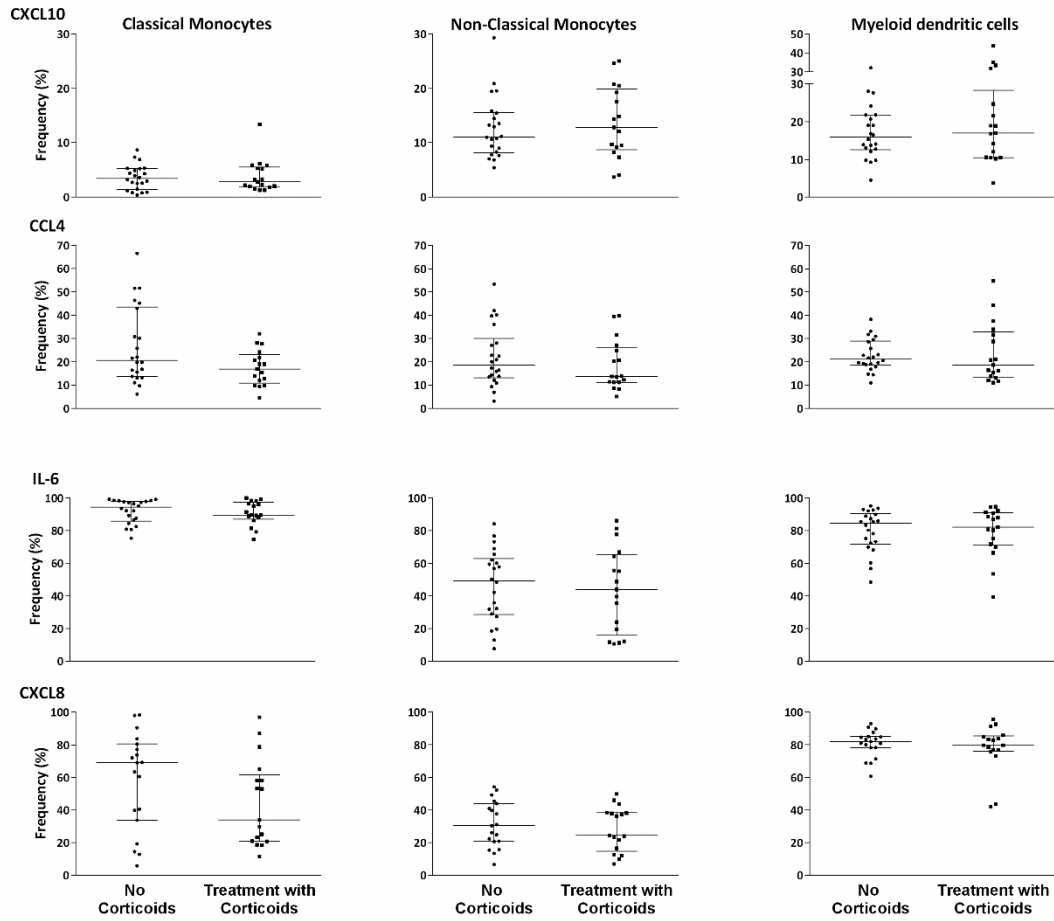

Supplement: MOESM1 [file 15213228]
