# Supplementary material for: Increased frequencies of circulating CXCL10-, CXCL8- and CCL4-producing monocytes and Siglec-3-expressing myeloid dendritic cells in systemic sclerosis patients
Source: Springer Nature journal article supplement (doi:10.1007/s00011-017-1106-7), 2017-11-10
Supplement: MOESM2 [file 15213228]

## **Inflammation Research**

### **Increased frequencies of circulating CXCL10-, CXCL8- and CCL4-producing monocytes and Siglec-3-expressing myeloid dendritic cells in Systemic Sclerosis patients.**

Tiago Carvalho<sup>1,2,3\*</sup>, Sara Horta<sup>1,4\*</sup>, Joel A.G. van Roon<sup>2,3</sup>, Mariana Santiago<sup>5</sup>, Maria J. Salvador<sup>5</sup>, Hélder Trindade<sup>1</sup>, Timothy R.D.J. Radstake<sup>2,3</sup>, José A.P. da Silva<sup>5,6</sup>, Artur Paiva<sup>1,7</sup>

#### **Affiliations:**

<sup>1</sup>Blood and Transplantation Center of Coimbra, Portuguese Institute of Blood and Transplantation, Coimbra, Portugal

<sup>2</sup>Department of Rheumatology & Clinical Immunology, University Medical Center Utrecht, the Netherlands.

<sup>3</sup>Laboratory of Translational Immunology, University Medical Center Utrecht, the Netherlands.

<sup>4</sup>Department of Chemistry, University of Aveiro, Aveiro, Portugal

<sup>5</sup>Department of Rheumatology, Coimbra University Hospital Center, Coimbra, Portugal,

<sup>6</sup>Faculty of Medicine, University of Coimbra, Coimbra, Portugal

<sup>7</sup>Flow Cytometry Unit, Clinical Pathology Service, Coimbra University Hospital Center, Coimbra, Portugal

\*T. Carvalho and S. Horta equally contributed to this work.

#### **Corresponding author:**

Artur Paiva, *PhD*

Unidade de Gestão Operacional de Citometria, Serviço de Patologia Clínica

Praceta Prof. Mota Pinto, Ed. S. Jerónimo, 3º piso, 30001-301 Coimbra, Portugal

Tel: (+351) 239400400

E-mail: artur.paiva@chuc.min-saude.pt

## Supplementary Materials and Methods

### *Quantification of monocytes subsets and myeloid dendritic cells*

The quantification of classical, non-classical monocytes and myeloid dendritic cells (mDC) was performed in 0.2 mL of whole blood collected into K<sub>3</sub>- Ethylenediamine tetraacetic acid (EDTA) tubes, stained with the following monoclonal antibodies combination: anti-CD45 Krome Orange (clone: J.33; Beckman Coulter – Immunotech; Marseille, France), anti-CD11c Phycoerythrin- Cyanine -5 tandem (clone: B-ly6, BD Pharmingen), anti-HLA-DR Pacific Blue (clone: Immu-357; Beckman Coulter – Immunotech), anti-CD14 Allophycocyanin- Hellite -7 tandem (clone: MφP9; BD Biosciences, San Jose, CA, USA), anti-CD16 Fluorescein Isothiocyanate (clone: CLB-Fc-gran/1; Sanquin, Amsterdam, the Netherlands), anti-CD33 Phycoerythrin- Cyanine -7 tandem (clone: D3HL60.251; Beckman Coulter – Immunotech). Sample were then incubated for 15 min at room temperature in darkness. After this incubation period, a lyse and wash protocol was followed: 2 mL of FACS Lysing Solution (BD Biosciences) diluted 1:10 (vol/vol) in distilled water was added, and after 10 min of incubation, the cells were washed with 2 mL of PBS and resuspended in 0.5 mL of PBS before acquisition.

Data acquisition was performed in an FACSCanto™II (BD Biosciences) flow cytometer equipped with FACSDiva software (version 6.1.2; BD Biosciences). For data analysis, Infinicyt (version 1.6) software (Cytognos SL, Salamanca, Spain) was used. Absolute counts were calculated using a dual platform methodology (flow cytometry and hematological cell analyzer).
